# Supplementary material for: Self-healing microcapsules encapsulated with carbon nanotubes for improved thermal and electrical properties
Source: Royal Society of Chemistry journal article supplement (doi:10.1039/d0ra06631a), 2020-01-01
Supplement: d0ra06631a1.pdf [file d0ra06631a1.pdf]

**Supporting information:**

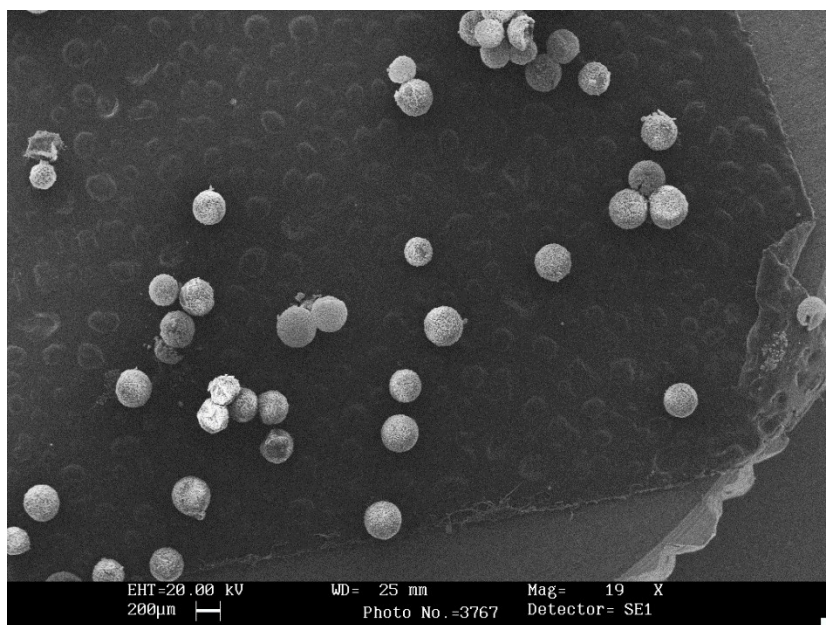

**Figure S1.** SEM image showing the cluster of DCPD-CNT-UF microcapsules

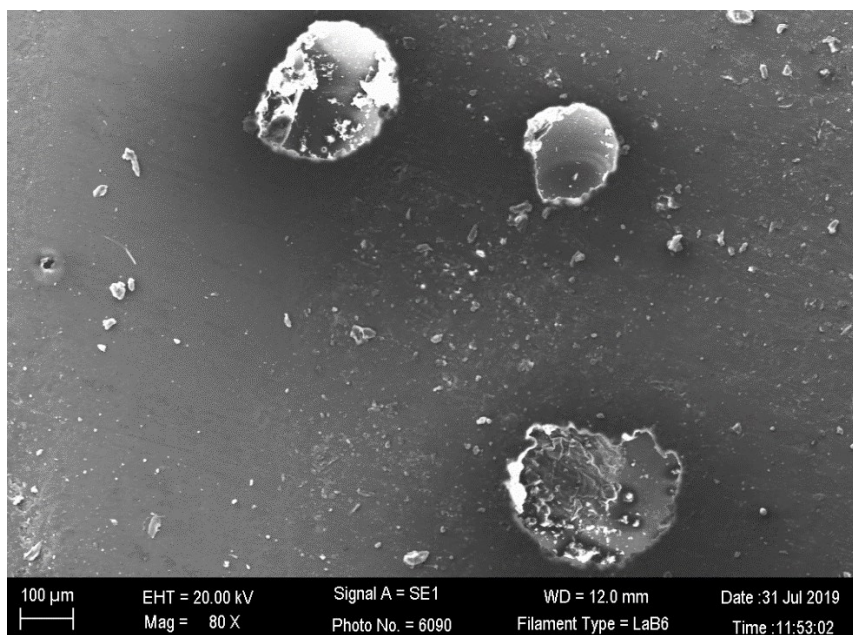

**Figure S2.** SEM image of broken DCPD-CNT-UF microcapsules on the surface of epoxy resin cast specimen
